# Supplementary material
Source: PubMed Central journal article supplement (PMC4225544)
Supplement: NIHMS636465-supplement-Online_Suppl_Material.pdf [file NIHMS636465-supplement-Online_Suppl_Material.pdf]

## Online Only Supplemental Material

Knip M, Åkerblom HK, Becker D, et al; the TRIGR Study Group. Hydrolyzed Infant Formula and Early  $\beta$ -Cell Autoimmunity: A Randomized Clinical Trial. *JAMA*. doi:10.1001/jama.2014.5610

**eTable 1.** List of TRIGR Study Group Members

**eTable 2.** The Autoantibody Reactivity Appearing First in the Casein Hydrolysate Group and in the Control Group

**eTable 3.** Initial and Maximal Autoantibody Titers in the Casein Hydrolysate Group and in the Control Group

**eTable 4.** Reported Adverse Events in the 2 Arms of the TRIGR Study

**eFigure 1.** Cumulative Survival of at Least 2 Autoantibodies and of at Least 1 Autoantibody According to the Per-Protocol Analysis

**eFigure 2.** Cumulative Survival Without Islet Cell Antibodies, Insulin Autoantibodies and Autoantibodies to Glutamic Acid Decarboxylase and the Insulinoma-Associated 2 Molecule (IA-2) in the 2 Study Groups According to the Per-Protocol Analysis

**eFigure 3.** Hazard Ratios (95% CI) for Subgroups in the Whole Trial (A) and for Subgroups Among the Finnish Participants According to the Per-Protocol Analysis (B)

This supplementary material has been provided by the authors to give readers additional information about their work

**eTable 1.** List of TRIGR Study Group Members

**TRIGR STUDY GROUP**

|                                                                   | <u>Last name</u>                                  | <u>First name</u> | <u>Position</u>                                             |
|-------------------------------------------------------------------|---------------------------------------------------|-------------------|-------------------------------------------------------------|
| <b>Administration</b>                                             |                                                   |                   |                                                             |
| <b>Data Safety Monitoring Board</b>                               | Mandrup-Poulsen                                   | Thomas            | Chair                                                       |
|                                                                   | Arjas                                             | Elja              | Member                                                      |
|                                                                   | Lernmark                                          | Åke               | Member                                                      |
|                                                                   | Läärä                                             | Esa               | Member                                                      |
|                                                                   | Schmidt                                           | Barbara           | Member                                                      |
|                                                                   | Krischer                                          | Jeffrey P.        | Observer                                                    |
| <b>International Coordinating Center (ICC), Helsinki, Finland</b> | Åkerblom                                          | Hans K.           | PI of the Study until 30.6.08,<br>Deputy PI from 1.7.2008   |
|                                                                   | Hyytinen                                          | Mila              | European Study Monitor                                      |
|                                                                   | Knip                                              | Mikael            | Deputy PI until 30.6.2008,<br>PI of the Study from 1.7.2008 |
|                                                                   | Koski                                             | Katriina          | National Investigator                                       |
|                                                                   | Koski                                             | Matti             | European Study Monitor                                      |
|                                                                   | Merentie                                          | Kristiina         | IT Specialist                                               |
|                                                                   | Pajakkala                                         | Eeva              | European Study Monitor                                      |
|                                                                   | Reunanen                                          | Antti             | European Study Monitor                                      |
|                                                                   | Salonen                                           | Marja             | Co-Investigator                                             |
|                                                                   | Terhonen                                          | Tuija             | Study Coordinator                                           |
|                                                                   | Virkkunen                                         | Seija             | Secretary                                                   |
|                                                                   | <b>Data Management Unit (DMU), Tampa, FL, USA</b> | Cuthbertson       | David                                                       |
| Gainer                                                            |                                                   | Bruce             | Biostatistician                                             |
| Hadley                                                            |                                                   | David             | Programmer                                                  |
| Krischer                                                          |                                                   | Jeffrey P.        | Epidemiologist                                              |
| Malloy                                                            |                                                   | Jamie             | PI of the DMU                                               |
| Nallamshetty                                                      |                                                   | Lavanya           | Programmer                                                  |
| Shanker                                                           |                                                   | Linda             | Programmer                                                  |
|                                                                   |                                                   | Coordinator       |                                                             |

...continued **eTable 1.** List of TRIGR Study Group Members

|                                                                                                               |                                                                    |                            |                                                                                             |
|---------------------------------------------------------------------------------------------------------------|--------------------------------------------------------------------|----------------------------|---------------------------------------------------------------------------------------------|
| <b>Canadian Coordinating Center,<br/>London and Ottawa, ON</b>                                                | Bradley Dupré                                                      | Brenda John                | National Coordinator<br>Co-PI for North America,<br>National Investigator                   |
|                                                                                                               | Lough Nielsen<br>Fraser                                            | Gigi Debra<br>William      | National Coordinator<br>Administrator<br>Co-Investigator for Canada,<br>Executive Committee |
|                                                                                                               | Lawson                                                             | Margaret L.                | Co-Investigator for Canada,<br>Executive Committee                                          |
|                                                                                                               | Mahon                                                              | Jeffrey L.                 | Co-Investigator for Canada,<br>Executive Committee                                          |
|                                                                                                               | Sermer                                                             | Mathew                     | Co-Investigator for Canada,<br>Executive Committee                                          |
|                                                                                                               | Taback                                                             | Shayne P.                  | Co-Investigator for Canada,<br>Executive Committee                                          |
|                                                                                                               | <b>USA Coordinating Center,<br/>Pittsburgh, PA and Seattle, WA</b> | Becker                     | Dorothy                                                                                     |
| Franciscus<br>Nucci<br>Palmer                                                                                 |                                                                    | Margaret<br>Anita<br>Jerry | National Coordinator<br>Nutrition Coordinator of North America<br>Executive Committee       |
| <b>Nutritional Epidemiology Unit,<br/>National Institute for Health and<br/>Welfare<br/>Helsinki, Finland</b> |                                                                    | Alahuhta                   | Kirsi                                                                                       |
|                                                                                                               | Bärlund                                                            | Sonja                      | Research Fellow                                                                             |
|                                                                                                               | Korhonen                                                           | Tuuli                      | Research Fellow                                                                             |
|                                                                                                               | Lehtonen                                                           | Eveliina                   | Research Fellow                                                                             |
|                                                                                                               | Pekkala                                                            | Minna                      | Research Fellow                                                                             |
|                                                                                                               | Sorkio                                                             | Susa                       | Research Fellow                                                                             |
|                                                                                                               | Vähätalo                                                           | Liisa                      | Research Fellow                                                                             |
|                                                                                                               | Virtanen                                                           | Suvi M.                    | Head of Nutritional Epidemiology Unit                                                       |
|                                                                                                               | Uusitalo                                                           | Ulla                       | Research Fellow                                                                             |
|                                                                                                               | Öhman                                                              | Taina                      | Research fellow                                                                             |

...continued **eTable 1.** List of TRIGR Study Group Members

| <b>Countries</b>                                   | <b>Study Centers</b>                                                                |           |                      |                             |
|----------------------------------------------------|-------------------------------------------------------------------------------------|-----------|----------------------|-----------------------------|
| <b>Australia</b>                                   | <b>AUS01 - Westmead - Children's Hospital</b>                                       | Bongiorno | Ros                  | Study Dietitian             |
|                                                    |                                                                                     | Catteau   | Jacki                | National Coordinator        |
|                                                    |                                                                                     | Fraser    | Glenda               | National Coordinator        |
|                                                    |                                                                                     | Howard    | Neville              | National Investigator       |
|                                                    |                                                                                     | Lloyd     | Margaret             | Study nurse                 |
|                                                    | <b>AUS02 - Newcastle - John Hunter Children's Hospital</b>                          | Crock     | Patricia             | Local Investigator          |
|                                                    |                                                                                     | Giles     | Michelle             | Study Nurse                 |
|                                                    |                                                                                     | Siech     | Krystyna             | Study Nurse                 |
|                                                    |                                                                                     | Wong See  | Denise               | Study Dietitian             |
| <b>AUS03 - Sydney - Sydney Children's Hospital</b> | Brown                                                                               | Christina | Study Dietitian      |                             |
|                                                    | Catteau                                                                             | Jacki     | National Coordinator |                             |
|                                                    | Craig                                                                               | Maria     | Local Investigator   |                             |
|                                                    | Johnston                                                                            | Amanda    | Study Dietitian      |                             |
| <b>Canada</b>                                      | <b>CAN01 - London - St. Joseph's Health Care Centre</b>                             | Bere      | Lynda J.             | Local Coordinator           |
|                                                    |                                                                                     | Clarson   | Cheril L.            | Local Investigator          |
|                                                    |                                                                                     | Jenner    | Morris               | Co-Investigator             |
|                                                    |                                                                                     | Mahon     | Jeffrey L.           | Co-Investigator             |
|                                                    |                                                                                     | McManus   | Ruth                 | Co-Investigator             |
|                                                    |                                                                                     | Renato    | Natale               | Co-Investigator             |
|                                                    | <b>CAN02 - Vancouver - Children's and Women's Health Centre of British Columbia</b> | Higo      | Debbie               | Local Coordinator           |
|                                                    |                                                                                     | Kent      | Nancy                | Co-Investigator             |
|                                                    |                                                                                     | Kozak     | Sharon               |                             |
|                                                    |                                                                                     | Kwan      | Jennifer             | Coordinator (in Transition) |
|                                                    |                                                                                     | Marshall  | Colleen              | Coordinator (In Transition) |
|                                                    |                                                                                     | Metzger   | Daniel               | Local Investigator          |
|                                                    |                                                                                     | Stewart   | Laura                | Co-Investigator             |
|                                                    |                                                                                     | Taylor    | Cheryl               |                             |
|                                                    |                                                                                     | Thompson  | David                | Local Investigator          |
| Tong                                               | Suet On                                                                             |           |                      |                             |

...continued **eTable 1.** List of TRIGR Study Group Members

|                                                                                        |                  |                |                      |
|----------------------------------------------------------------------------------------|------------------|----------------|----------------------|
| <b>CAN03 - Calgary - Alberta Children's Hospital</b>                                   | Edwards          | Alun           | Co-Investigator      |
|                                                                                        | Lange            | Ian            | Co-Investigator      |
|                                                                                        | Mercer           | Julia          |                      |
|                                                                                        | Pacaud           | Daniele        | Co-Investigator      |
|                                                                                        | Schwarz          | Wendy          | Local Coordinator    |
|                                                                                        | Stephure         | David K.       | Local Investigator   |
|                                                                                        | Swaby            | Cheryl         |                      |
| <b>CAN04 - Edmonton - Walter MacKenzie Health Sciences</b>                             | Baergen-Fladager | Sharlene       |                      |
|                                                                                        | Boer             | Jeanne         |                      |
|                                                                                        | Chatur           | Tameeza        | Local Coordinator    |
|                                                                                        | Chick            | Connie         | Co-Investigator      |
|                                                                                        | Couch            | Bob            | Co-Investigator      |
|                                                                                        | Demianczuk       | Nestor         | Local Investigator   |
|                                                                                        | Girgis           | Rose           | Local Investigator   |
|                                                                                        | Marks            | Seth           | Co-Investigator      |
|                                                                                        | Ryan             | Edmond         | Co-Investigator      |
|                                                                                        | Thompson         | Marilyn        | Local Coordinator    |
| <b>CAN05 - Winnipeg - Health Sciences Centre</b>                                       | Berard           | Lori           |                      |
|                                                                                        | Bloomfield       | Erika          |                      |
|                                                                                        | Catte            | Daniel         | Local Coordinator    |
|                                                                                        | Dean             | Heather J.     | Co-Investigator      |
|                                                                                        | Grant            | Lorna          | Co-Investigator      |
|                                                                                        | Hamelin          | Kathy          | Co-Investigator      |
|                                                                                        | LaForte          | Janine         | Local Coordinator    |
|                                                                                        | Murphy           | Liam           | Co-Investigator      |
|                                                                                        | Schneider        | Carol          | Co-Investigator      |
|                                                                                        | Sellers          | Elizabeth A.C. | Co-Investigator      |
|                                                                                        | Taback           | Shayne P.      | Local Investigator   |
|                                                                                        | Woo              | Vincent        | Co-Investigator      |
| <b>CAN06 - Ottawa - Children's Hospital of Eastern Ontario and The Ottawa Hospital</b> | Boland           | Alice          |                      |
|                                                                                        | Bradley          | Brenda         | National Coordinator |
|                                                                                        | Clark            | Heather D.     | Co-Investigator      |
|                                                                                        | Cooper           | Tammy          |                      |
|                                                                                        | Cormier          | Roxanne        |                      |

© 2014 American Medical Association. All rights reserved.

...continued **eTable 1.** List of TRIGR Study Group Members

|                                                                        |                                                                                                                                                                          |                                                                                                                                                   |                                                                                                                                                                                                                                       |
|------------------------------------------------------------------------|--------------------------------------------------------------------------------------------------------------------------------------------------------------------------|---------------------------------------------------------------------------------------------------------------------------------------------------|---------------------------------------------------------------------------------------------------------------------------------------------------------------------------------------------------------------------------------------|
|                                                                        | Frederick Good Gruslin Kane Karovitch Keely Lawson Lough Malcolm O'Shea Ranieri Rouatt Sauro Tawagi                                                                      | Catherine Melanie Andrée Dominique Alan Erin Margaret L. Gigi Janine C. Elaine Mary Sharon Victor George F.                                       | Co-Investigator<br>Co-Investigator<br>Local Investigator<br>National Coordinator<br>Co-Investigator<br>Co-Investigator<br>Co-Investigator<br>Co-Investigator                                                                          |
| <b>CAN07 - Toronto Mount Sinai Hospital/Hospital for Sick Children</b> | Andrighetti Aquilina Arnold Barrett Bartley Blumer Brush Daneman Donat Ehrlich Feig Gherson Gottesman Gysler Karkanis Kenshole Knight Lackie Lewis Martin Maxwell McLeod | Santina Andrea George Jon Connie Ian Cheryl Denis Diane Robert Denice Beth Irving Mathias Samuel Anne Byrton Elyse Valerie Mary Jean Cynthia Lynn | Co-Investigator<br>Co-Investigator<br>Co-Investigator<br>Co-Investigator<br>Local Investigator<br>Co-Investigator<br>Co-Investigator<br>Co-Investigator<br>Co-Investigator<br>Co-Investigator<br>Local Coordinator<br>Co-Investigator |

...continued **eTable 1.** List of TRIGR Study Group Members

|                                                                      |               |                |                    |
|----------------------------------------------------------------------|---------------|----------------|--------------------|
|                                                                      | Oliver        | Gillian        | Co-Investigator    |
|                                                                      | Panchum       | Paul           | Co-Investigator    |
|                                                                      | Sermer        | Mathew         | Local Investigator |
|                                                                      | Shillette     | Nicholas       | Co-Investigator    |
|                                                                      | Simone        | Angelo         | Co-Investigator    |
|                                                                      | Skidmore      | Martin         | Co-Investigator    |
|                                                                      | Turrini       | Tania          |                    |
|                                                                      | Wong          | Suzanne        | Co-Investigator    |
| <b>CAN08 - Quebec - CHUQ</b>                                         | Allen         | Christine      | Co-Investigator    |
|                                                                      | Bélangier     | Lise           | Co-Investigator    |
|                                                                      | Bouchard      | Isabelle       | Co-Investigator    |
|                                                                      | Chapdelaine   | Magalie        |                    |
|                                                                      | Ferland       | Suzanne        | Local Coordinator  |
|                                                                      | Frenette      | Line           | Local Investigator |
|                                                                      | Garrido-Russo | Maria          | Co-Investigator    |
|                                                                      | Latulippe     | Diane          |                    |
|                                                                      | Leblanc       | Mylene         | Local Coordinator  |
|                                                                      | Imbeault      | Jérôme         |                    |
|                                                                      | Marc          | Isabelle       |                    |
|                                                                      | Morin         | Valérie        | Local Investigator |
|                                                                      | Olivier       | Guy            | Co-Investigator    |
|                                                                      | Weisnagell    | John           | Co-Investigator    |
| <b>CAN09 - Saint John Regional Hospital - Horizon Health Network</b> | Costain       | Garry          | Co-Investigator    |
|                                                                      | Dornan        | John           | Co-Investigator    |
|                                                                      | Heath         | Kathy          | Local Coordinator  |
|                                                                      | MacSween      | Mary-Catherine | Co-Investigator    |
|                                                                      | McGibbon      | Angela         |                    |
|                                                                      | Ramsay        | Carolyn        |                    |
|                                                                      | Sanderson     | Frank          | Co-Investigator    |
|                                                                      | Sanderson     | Susan          | Local Investigator |
| <b>CAN10 - Montreal - L' Hôpital Sainte-Justine</b>                  | Anctil        | Colette        |                    |
|                                                                      | Benabdesselam | Linda          |                    |
|                                                                      | Fraser        | William        | Co-Investigator    |
|                                                                      | Gonthier      | Monique        | Co-Investigator    |

...continued **eTable 1.** List of TRIGR Study Group Members

|                                                                         |             |              |                    |
|-------------------------------------------------------------------------|-------------|--------------|--------------------|
|                                                                         | Huot        | Céline       | Local Investigator |
|                                                                         | Lagace      | Maryse       | Back-up Nurse      |
|                                                                         | Lortie      | Louise       |                    |
|                                                                         | Roy         | Chantal      |                    |
|                                                                         | Thibeault   | Maryse       | Local Coordinator  |
| <b>CAN11 - Montreal Children's Hospital</b>                             | Diotalevi   | Sabrina      |                    |
|                                                                         | Gagné       | Valérie      |                    |
|                                                                         | Laforte     | Diane        | Local Coordinator  |
|                                                                         | Legault     | Laurent      | Local Investigator |
|                                                                         | Perron      | Patrice      | Co-Investigator    |
| <b>CAN12 - Halifax - IWK Health Centre/Dalhousie</b>                    | Armson      | Anthony      | Co-Investigator    |
|                                                                         | Canning     | Paula        |                    |
|                                                                         | Cummings    | Elizabeth A. | Local Investigator |
|                                                                         | Hardie      | Rebecca      | Local Coordinator  |
|                                                                         | Ivanko      | Vanda        |                    |
|                                                                         | McLeod      | Lynne        | Co-Investigator    |
|                                                                         | McPhee      | Anita        |                    |
|                                                                         | Mokashi     | Arati        | Co-Investigator    |
|                                                                         | Morrison    | Lisa         |                    |
|                                                                         | Scott       | Karen        | Local Coordinator  |
| <b>CAN13 - St. John's - Janeway Child Health Center</b>                 | Bridger     | Tracey       | Local Investigator |
|                                                                         | Crane       | Joan         | Co-Investigator    |
|                                                                         | Crummell    | Cheryl       | Local Coordinator  |
|                                                                         | Curtis      | Joseph C.    | Co-Investigator    |
|                                                                         | Dawson      | Colette      |                    |
|                                                                         | Grant       | Marie        |                    |
|                                                                         | Joyce       | Carol        | Co-Investigator    |
|                                                                         | Newhook     | Leigh Anne   | Co-Investigator    |
| <b>CAN14 - Kingston - Kingston General Hospital/ Queen's University</b> | Begum-Hasan | Jahanara     | Co-Investigator    |
|                                                                         | Breen       | Adriana      | Local Coordinator  |
|                                                                         | Chambers    | Beverly      |                    |
|                                                                         | Houlden     | Robyn        | Local Investigator |



...continued **eTable 1.** List of TRIGR Study Group Members

|                       |                                                                   |                                                                                                                                                                                             |                                                                                                                                                     |                                                                                                                                                                                                                                                                                                              |
|-----------------------|-------------------------------------------------------------------|---------------------------------------------------------------------------------------------------------------------------------------------------------------------------------------------|-----------------------------------------------------------------------------------------------------------------------------------------------------|--------------------------------------------------------------------------------------------------------------------------------------------------------------------------------------------------------------------------------------------------------------------------------------------------------------|
|                       |                                                                   | Woods                                                                                                                                                                                       | Marie                                                                                                                                               |                                                                                                                                                                                                                                                                                                              |
|                       | <b>CAN15 - Regina - Regina Qu'Appelle</b>                         | Carrson<br>Kelly                                                                                                                                                                            | George<br>Sheila                                                                                                                                    | Local Investigator<br>Local Coordinator                                                                                                                                                                                                                                                                      |
|                       | <b>CAN16 - Saskatoon - Royal University Hospital</b>              | Andreychuk<br>Martel<br>Penner<br>Sankaran                                                                                                                                                  | Brenda<br>Marie, Jocelyne<br>Marie<br>Koravangattu                                                                                                  | Co-Investigator<br>Local Coordinator<br>Local Investigator                                                                                                                                                                                                                                                   |
|                       | <b>CAN17 - Peterborough - Peterborough Regional Health Centre</b> | Burnie<br>Hardy-Brown<br>King<br>White                                                                                                                                                      | Shay<br>Karolyn<br>Nancy<br>Richard A.                                                                                                              | Local Coordinator<br>Local Coordinator<br>Local Investigator                                                                                                                                                                                                                                                 |
|                       | <b>CAN18 - Victoria - Vancouver Island Health Research Centre</b> | Park<br>Peters<br>Popkin<br>Robson                                                                                                                                                          | Marilyn<br>Delane<br>James<br>Laurie                                                                                                                | Local Investigator<br>Local Coordinator                                                                                                                                                                                                                                                                      |
| <b>Czech Republic</b> | <b>CZE01 - Prague - Faculty Hospital Kralovske Vinohrady</b>      | Al Taji<br>Aldhoon<br>Cerna<br>Cerny<br>Francova<br>Hainerova<br>Kothankova<br>Koukalova<br>Krakorova<br>Mendlova<br>Romanova<br>Sitova<br>Stechova<br>Vavrinec<br>Vosahlo<br>Zlatohlavkova | Eva<br>Irena<br>Marcela<br>Milos<br>Helena<br>Irena<br>Hana<br>Renata<br>Vladimira<br>Pavla<br>Martina<br>Radka<br>Katerina<br>Jan<br>Jan<br>Blanka | National Coordinator<br>Co-Investigator<br>Co-Investigator<br>Co-Investigator<br>Study Nurse<br>Co-Investigator<br>Study Nurse<br>Study Nurse<br>Study Nurse<br>National Coordinator<br>Co-Investigator<br>Study Dietitian<br>Co-Investigator<br>National Investigator<br>Co-Investigator<br>Co-Investigator |

...continued **eTable 1.** List of TRIGR Study Group Members

|                |                                                             |                                                                             |                                                                |                                                                                                                          |
|----------------|-------------------------------------------------------------|-----------------------------------------------------------------------------|----------------------------------------------------------------|--------------------------------------------------------------------------------------------------------------------------|
|                | <b>CZE02 - Brno - Hospital Milosrdnych Bratri</b>           | Brazdova                                                                    | Ludmila                                                        | Local Investigator                                                                                                       |
|                | <b>CZE03- Olomouc - Faculty Hospital Olomouc</b>            | Faksova<br>Gregorova<br>Kantor<br>Malkova<br>Venhacova<br>Venhacova         | Petra<br>Dana<br>Lumir<br>Kamila<br>Jitrenka<br>Petra          | Study Nurse<br>Study Nurse<br>Co-Investigator<br>Study Nurse<br>Local Investigator<br>Co-Investigator                    |
|                | <b>CZE04 - Usti nad Labem - Hospital of Masaryk</b>         | Cipra<br>Skvor                                                              | Adam<br>Jaroslav                                               | Local Investigator<br>Co-Investigator                                                                                    |
|                | <b>CZE05 - Ceske Budejovice - Hospital Ceske Budejovice</b> | Tomsikova                                                                   | Zdenka                                                         | Local Investigator                                                                                                       |
|                | <b>CZE06 - Plzen - Faculty Hospital Plzen</b>               | Botkova-Krauseova<br>Mockova<br>Krcikova                                    | Hana<br>Alice<br>Petra                                         | Local Investigator<br>Co-Investigator<br>Local Investigator                                                              |
|                | <b>CZE07 - Zlin - Hospital of Bata</b>                      | Gogelova<br>Kandrnalova                                                     | Pavla<br>Jitka                                                 | Local Investigator<br>Local Investigator                                                                                 |
| <b>Estonia</b> | <b>EST01 - Tallinn - Tallinn Children's Hospital</b>        | Einberg<br>Jakovlev<br>Krassotkina<br>Rannaste<br>Raukas<br>Riikjäv<br>Mark | Ülle<br>Ülle<br>Svetlana<br>Eve<br>Reet<br>Mall-Anne<br>Kairit | Co-Investigator<br>Co-Investigator<br>Study Nurse<br>Study Nurse<br>Co-Investigator<br>Local Investigator<br>Study Nurse |
|                | <b>EST02 - Tartu - Tartu University Children's Hospital</b> | Astover<br>Kirss<br>Ormisson<br>Retpap<br>Täht                              | Valve<br>Anne<br>Anne<br>Jana<br>Ene                           | Co-Investigator<br>Co-Investigator<br>National Investigator<br>Study Nurse<br>Study Nurse                                |

...continued eTable 1. List of TRIGR Study Group Members

|                |                                                                                           |                       |                   |                                    |
|----------------|-------------------------------------------------------------------------------------------|-----------------------|-------------------|------------------------------------|
|                |                                                                                           | Tillmann<br>Vahtra    | Vallo<br>Sille    | Co-Investigator<br>Study assistant |
| <b>Finland</b> | <b>FIN01 - Helsinki - Children's Hospital, University of Helsinki</b>                     | Åkerblom              | Hans K.           | Co-Investigator                    |
|                |                                                                                           | Heikkilä              | Maija             | National Nutrition Coordinator     |
|                |                                                                                           | Luopajarvi            | Kristiina         | Local Investigator                 |
|                |                                                                                           | Kleemola              | Päivi             |                                    |
|                |                                                                                           | Knip                  | Mikael            | National Investigator              |
|                |                                                                                           | Laukkanen             | Elina             | Local Coordinator                  |
|                |                                                                                           | Parkkola              | Anna              | Local Investigator                 |
|                |                                                                                           | Pigg                  | Hanna-Mari        | National Nutrition Coordinator     |
|                |                                                                                           | Puttonen              | Hilkka            | National Coordinator               |
|                |                                                                                           | Renlund               | Martin            | Co-Investigator                    |
|                |                                                                                           | Suomalainen           | Heli              | National Coordinator               |
|                |                                                                                           | Tenkula               | Tarja             | Local Coordinator                  |
|                |                                                                                           | Teramo                | Kari              | Co-Investigator                    |
|                | <b>FIN02 - Helsinki - Department of Obstetrics and Gynecology, University of Helsinki</b> | Järvenpää             | Anna-Liisa        | Local Investigator                 |
|                | <b>FIN03 - Espoo - Jorvi Hospital</b>                                                     | Hämäläinen<br>Jussila | Anu-Maaria<br>Rea | Local Investigator<br>Study Nurse  |
|                | <b>FIN04 - Kotka - Kymenlaakso Central Hospital</b>                                       | Haavisto              | Hannu             | Local Investigator                 |
|                |                                                                                           | Holopainen            | Seija             | Study Nurse                        |
|                |                                                                                           | Kupiainen             | Harriet           | Study Dietitian                    |
|                |                                                                                           | Leeve                 | Tuula             | Study Nurse                        |
|                |                                                                                           | Lumme                 | Kari              | Co-Investigator                    |
|                |                                                                                           | Nironen               | Tuula             | Study Dietitian                    |
|                |                                                                                           | Tenhola               | Sirpa             | Local Investigator                 |
|                |                                                                                           | Tiilikainen           | Teea              | Study Nurse                        |

...continued **eTable 1.** List of TRIGR Study Group Members

|                                                                                |                             |                        |                    |
|--------------------------------------------------------------------------------|-----------------------------|------------------------|--------------------|
| <b>FIN05 - Lahti - Paijat-Hame Central Hospital</b>                            | Keinonen                    | Hilkka                 | Study Dietitian    |
|                                                                                | Lautala                     | Pentti                 | Local Investigator |
|                                                                                | Salonen                     | Pia                    | Local Investigator |
|                                                                                | Vesanto                     | Maarit                 | Study Nurse        |
| <b>FIN06 - Tampere - Department of Pediatrics, Tampere University Hospital</b> | Aspholm                     | Anna Susanna<br>Helena | Local Investigator |
|                                                                                | Asunta                      | Paula                  | Local Coordinator  |
|                                                                                | Ikävalko                    | Heidi                  | Study Nurse        |
|                                                                                | Jäminki                     | Sinikka                | Local Coordinator  |
|                                                                                | Kekki                       | Päivi                  | Co-Investigator    |
|                                                                                | Koskinen                    | Merja                  | Study Nurse        |
|                                                                                | Lehtimäki                   | Susanna                | Study Nurse        |
|                                                                                | Lähde                       | Jyrki                  | Local Investigator |
|                                                                                | Mäkelä                      | Mariariitta            | Study Dietitian    |
|                                                                                | Peltoniemi                  | Sari                   | Co-Investigator    |
|                                                                                | Poutiainen                  | Laura                  | Study Dietitian    |
|                                                                                | Ranta                       | Kari                   | Co-Investigator    |
|                                                                                | Salonsaari                  | Tiina                  | Co-Investigator    |
|                                                                                | Sarviharju-Tujula           | Sanna-Leena            | Co-Investigator    |
| Siljander                                                                      | Heli                        | Co-Investigator        |                    |
| <b>FIN07 - Pori - Satakunta Central Hospital</b>                               | Haanpaa                     | Pirkko-Liisa           | Study Nurse        |
|                                                                                | Holm                        | Carita                 | Local Investigator |
|                                                                                | Järveläinen                 | Virpi                  | Study Dietitian    |
|                                                                                | Kangaskolkka-<br>Keskilohko | Anna-Mari              | Study Nurse        |
|                                                                                | Laino                       | Eila                   | Study Nurse        |
|                                                                                | Marjamäki                   | Liisa                  | Study Dietitian    |
|                                                                                | Suominen                    | Eila                   | Study Dietitian    |
|                                                                                | Ylitalo                     | Samuli                 | Local Investigator |
| <b>FIN08 - Jyväskylä - Central Finland Central Hospital</b>                    | Hokkanen                    | Marika                 | Study Nurse        |
|                                                                                | Lounamaa                    | Raisa                  | Co-Investigator    |
|                                                                                | Matikainen                  | Minna                  | Study Dietitian    |
|                                                                                | Nuuja                       | Anja                   | Local Investigator |
|                                                                                | Puupponen                   | Anna Riikka            | Study Nurse        |

© 2014 American Medical Association. All rights reserved.

...continued **eTable 1.** List of TRIGR Study Group Members

|                                                                              |              |             |                    |
|------------------------------------------------------------------------------|--------------|-------------|--------------------|
|                                                                              | Salo-Edwards | Heli        | Study Nurse        |
| <b>FIN09 - Seinäjoki - South Ostrobothnia Central Hospital</b>               | Alanne       | Soili       | Study Dietitian    |
|                                                                              | Kultti       | Tiina       | Study Nurse        |
|                                                                              | Linjama      | Hilpi       | Study Dietitian    |
|                                                                              | Muhonen      | Katja       | Study Dietitian    |
|                                                                              | Sauna-aho    | Maija       | Study Dietitian    |
|                                                                              | Talvitie     | Timo        | Local Investigator |
| <b>FIN10 - Hyvinkää - Hyvinkää Hospital</b>                                  | Backman      | Mirja       | Study Nurse        |
|                                                                              | Hanhijärvi   | Raija       | Local Investigator |
|                                                                              | Koivula      | Pirjo       | Study Nurse        |
|                                                                              | Lindström    | Kaija       | Local Investigator |
|                                                                              | Martikainen  | Anni        | Study Dietitian    |
|                                                                              | Nurmi        | Pirjo       | Study Dietitian    |
| <b>FIN11 - Kuopio - Department of Pediatrics, Kuopio University Hospital</b> | Björk        | Anne        | Local Coordinator  |
|                                                                              | Huopio       | Hanna       | Local Investigator |
|                                                                              | Komulainen   | Jorma       | Local Investigator |
|                                                                              | Lehtomäki    | Soili       | Study Dietitian    |
|                                                                              | Muikku       | Eeva        | Study Nurse        |
|                                                                              | Pesola       | Jouni       | Co-Investigator    |
|                                                                              | Sankilampi   | Ulla        | Co-Investigator    |
| <b>FIN12 - Oulu - Department of Pediatrics, Oulu University Hospital</b>     | Arkkola      | Tuula       | Study Dietitian    |
|                                                                              | Hekkala      | Anne        | Co-Investigator    |
|                                                                              | Jurvakainen  | Sanna       | Study Nurse        |
|                                                                              | Koivikko     | Minna-Liisa | Study Nurse        |
|                                                                              | Kähönen      | Miia        | Study Nurse        |
|                                                                              | Leinonen     | Erja        | Co-Investigator    |
|                                                                              | Mykkänen     | Teija       | Study Nurse        |
|                                                                              | Pohjola      | Hilkka      | Local Coordinator  |
|                                                                              | Riikonen     | Kaisu       | Study Nurse        |
|                                                                              | Niittyvuopio | Aune        | Local Coordinator  |
|                                                                              | Stenius      | Aino        | Study Nurse        |
|                                                                              | Tapanainen   | Päivi       | Co-Investigator    |
|                                                                              | Veijola      | Riitta      | Local Investigator |

...continued **eTable 1.** List of TRIGR Study Group Members

|                                                               |                                                           |             |                    |                       |
|---------------------------------------------------------------|-----------------------------------------------------------|-------------|--------------------|-----------------------|
| <b>FIN13 - Hämeenlinna - Kanta-Häme Central Hospital</b>      | Alar                                                      | Abram       | Local Investigator |                       |
|                                                               | Jovio                                                     | Senja       | Study Nurse        |                       |
|                                                               | Korpela                                                   | Paavo       | Local Investigator |                       |
|                                                               | Mäkinen                                                   | Enja        | Study Dietitian    |                       |
| <b>FIN14 - Vaasa - Vaasa Central Hospital</b>                 | Hietanen                                                  | Liisa       | Study Nurse        |                       |
|                                                               | Kivistö                                                   | Johanna     | Study Nurse        |                       |
|                                                               | Käär                                                      | Marja-Liisa | Local Investigator |                       |
|                                                               | Lehtimäki                                                 | Päivi       | Study Nurse        |                       |
|                                                               | Mustila                                                   | Taina       | Local Investigator |                       |
|                                                               | Popov                                                     | Erik        | Local Investigator |                       |
|                                                               | Säätelä                                                   | Sirkku      | Study Nurse        |                       |
|                                                               | Taittonen                                                 | Leena       | Local Investigator |                       |
| <b>FIN15 - Lappeenranta - South Carelian Central Hospital</b> | Ahtiainen                                                 | Krista      | Local Investigator |                       |
|                                                               | Laaksonen                                                 | Nina        | Study Dietitian    |                       |
|                                                               | Luoto                                                     | Minna       | Study Nurse        |                       |
|                                                               | Viitala                                                   | Juha        | Local Investigator |                       |
|                                                               | Virransalo                                                | Ritva       | Local Investigator |                       |
| <b>FIN16 - Mikkeli - Mikkeli Central Hospital</b>             | Nykänen                                                   | Päivi       | Local Investigator |                       |
|                                                               | Paajanen                                                  | Satu        | Study Nurse        |                       |
|                                                               | Parkkinen                                                 | Satu        | Study Dietitian    |                       |
|                                                               | Pyrhönen                                                  | Heli        | Study Dietitian    |                       |
|                                                               | Särkkä                                                    | Terttu      | Study Nurse        |                       |
| <b>Germany</b>                                                | <b>GER01 - Hannover - Kinderkranken-haus auf der Bult</b> | Aschemeier  | Bärbel             | National Coordinator  |
|                                                               |                                                           | Bektas      | Sevim              | Study Nurse           |
|                                                               |                                                           | Danne       | Thomas             | National Investigator |
|                                                               |                                                           | Datz        | Nicolin            | Co-Investigator       |
|                                                               |                                                           | Deiss       | Dorothee           | Co-Investigator       |
|                                                               |                                                           | Kordonouri  | Olga               | Co-Investigator       |
|                                                               |                                                           | Lüpke       | Kerstin            | Co-Investigator       |
|                                                               |                                                           | Müller      | Babette            | Study Nurse           |
|                                                               |                                                           | Nestoris    | Claudia            | Co-Investigator       |
|                                                               |                                                           | Roths       | Silke              | Study Nurse           |

...continued **eTable 1.** List of TRIGR Study Group Members

|                |                                                            |                    |                                                |                       |               |                 |
|----------------|------------------------------------------------------------|--------------------|------------------------------------------------|-----------------------|---------------|-----------------|
|                |                                                            | Sadeghian          | Evelin                                         | Dietitian             |               |                 |
|                |                                                            | Semler             | Kerstin                                        | Study Nurse           |               |                 |
| <b>Hungary</b> | <b>HUN01 - Budapest - Semmelweis Medical University</b>    | Arató              | András                                         | Co-Investigator       |               |                 |
|                |                                                            | Krikovszky         | Dóra                                           | Co-Investigator       |               |                 |
|                |                                                            | Madácsy            | László                                         | National Investigator |               |                 |
|                |                                                            | Nobilis            | András                                         | Co-Investigator       |               |                 |
|                |                                                            | Szénási            | József                                         | Study Nurse           |               |                 |
| <b>Italy</b>   | <b>ITA01 - Rome - University Campus Bio-Medico of Rome</b> | Benevento          | Danila                                         | Co-Investigator       |               |                 |
|                |                                                            | Beretta Anguissola | Giuseppina                                     | Co-Investigator       |               |                 |
|                |                                                            | Biagioni           | Martina                                        | Co-Investigator       |               |                 |
|                |                                                            | Bizzarri           | Carla                                          | Co-Investigator       |               |                 |
|                |                                                            | Cherubini          | Valentino                                      | Co-Investigator       |               |                 |
|                |                                                            | Giordano           | Carla                                          | Co-Investigator       |               |                 |
|                |                                                            | Giorgetti          | Chiara                                         | Co-Investigator       |               |                 |
|                |                                                            | Khazrai            | Yeganeh Manon                                  | Local Coordinator     |               |                 |
|                |                                                            | Kyanvash           | Shadi                                          | Co-investigator       |               |                 |
|                |                                                            | Maddaloni          | Ernesto                                        | Local Coordinator     |               |                 |
|                |                                                            | Napoli             | Angela                                         | Co-Investigator       |               |                 |
|                |                                                            | Piergiovanni       | Fabio                                          | Co-Investigator       |               |                 |
|                |                                                            | Pitocco            | Dario                                          | Co-Investigator       |               |                 |
|                |                                                            | Pozzilli           | Paolo                                          | National Investigator |               |                 |
|                |                                                            | Suraci             | Titti                                          | Co-Investigator       |               |                 |
|                |                                                            | Valente            | Luciana                                        | Laboratory technician |               |                 |
|                |                                                            | Visalli            | Natalia                                        | Co-Investigator       |               |                 |
|                |                                                            |                    | <b>SAR01 - Cagliari - St. Michele Hospital</b> | Carboni               | M. Battistina | Study Dietitian |
|                |                                                            |                    |                                                | Casu                  | Anna          | Co-Investigator |
|                |                                                            |                    |                                                | Cavallo               | Roberta       |                 |
|                | Cau                                                        | Valeria            |                                                | Co-Investigator       |               |                 |
|                | Isola                                                      | Christina          |                                                | Co-Investigator       |               |                 |
|                | Ledda                                                      | Alessia            |                                                | Study Biologist       |               |                 |
|                | Loddo                                                      | Miriam             |                                                | Study Biologist       |               |                 |
|                | Mannu                                                      | Carla              |                                                | Local Coordinator     |               |                 |
|                | Pettinau                                                   | Marcella           |                                                | Study Biologist       |               |                 |
|                | Pisano                                                     | Silvia             |                                                | Co-Investigator       |               |                 |

...continued **eTable 1.** List of TRIGR Study Group Members

|                        |                                                              |                                                                                                               |                                                                                       |                                                                                                                                                         |
|------------------------|--------------------------------------------------------------|---------------------------------------------------------------------------------------------------------------|---------------------------------------------------------------------------------------|---------------------------------------------------------------------------------------------------------------------------------------------------------|
|                        |                                                              | Porceddu<br>Putzu<br>Rita<br>Songini                                                                          | Monica<br>Claudia<br>Angioni<br>Marco                                                 | Secretary<br>Co-Investigator<br>Co-Investigator<br>National Investigator                                                                                |
| <b>Luxembourg</b>      | <b>LUX01 - Luxembourg - Centre Hospitalier de Luxembourg</b> | de Beaufort<br>Peters<br>Schierloh                                                                            | Carine<br>Danielle<br>Ulrike                                                          | National Investigator<br>Study Dietitian<br>Co-Investigator                                                                                             |
| <b>The Netherlands</b> | <b>NET01 - Rotterdam - Sophia Children's Hospital</b>        | Bruining<br>Bisschoff<br>Blonk<br>Lappenschaar<br>Manai<br>Seesink<br>Sperling-Conrad<br>Verhagen<br>Zoethout | Jan<br>Margriet<br>Linda<br>Tanja<br>Badies<br>Maaike<br>Mona<br>Marit<br>Jan Age     | National Investigator<br>National Coordinator<br>Study Dietitian<br>Study Dietitian<br>Study Nurse<br>Study Dietitian<br>Study Dietitian<br>Study Nurse |
| <b>Poland</b>          | <b>POL01 - Wroclaw - Medical University of Wroclaw</b>       | Basiak<br>Chalas<br>Chesiak<br>Gramza<br>Iwankiewicz<br>Sieradzan<br>Wasikowa<br>Wikiera                      | Aleksander<br>Mariola<br>Maria<br>Agnieszka<br>Joanna<br>Elzbieta<br>Renata<br>Beata  | CoInvestigator<br>Study Nurse<br>Laboratory Assistant<br>Study Assistant<br>Co-Investigator<br>Study Nurse<br>National Investigator<br>Co-Investigator  |
|                        | <b>POL02 - Krakow - Polish-American Children's Hospital</b>  | Ciechanowska<br>Dziatkowiak<br>Futona<br>Górska<br>Głowacka-Woźny<br>Kaim<br>Klich<br>Starzyk                 | Marta<br>Hanna<br>Bernadetta<br>Aleksandra<br>Malgorzata<br>Irena<br>Barbara<br>Jerzy | Local Investigator<br>Co-Investigator<br>Study Nurse<br>Co-Investigator<br>Study Nurse<br>Co-Investigator<br>Laboratory Assistant<br>Co-Investigator    |



...continued **eTable 1.** List of TRIGR Study Group Members

|              |                                                                                                 |                                                                                                                                     |                                                                                                                    |                                                                                                                                                                                                                              |
|--------------|-------------------------------------------------------------------------------------------------|-------------------------------------------------------------------------------------------------------------------------------------|--------------------------------------------------------------------------------------------------------------------|------------------------------------------------------------------------------------------------------------------------------------------------------------------------------------------------------------------------------|
|              |                                                                                                 | Styrna<br>Tokarska                                                                                                                  | Monika<br>Lidia                                                                                                    | Dietician<br>Co-Investigator                                                                                                                                                                                                 |
|              | <b>POL03 - Katowice - Medical University of Silesia</b>                                         | Chucherco<br>Deja<br>Firek-Pedras<br>Jarosz-Chobot<br>Kalina<br>Kutrowska-Adamusiak<br>Minkina-Pedras<br>Muchacka-Bianga            | Dorota<br>Grazyna<br>Malgorzata<br>Przemyslawa<br>Maria<br>Krystyna<br>Mariola<br>Malgorzata                       | Study Nurse<br>Co-Investigator<br>Co-Investigator<br>Local Investigator<br>Co-Investigator<br>Co-Investigator<br>Co-Investigator<br>Co-Investigator                                                                          |
|              | <b>POL04 - Lodz - Medical University of Lodz</b>                                                | Bodalski<br>Mlynarski<br>Szadkowska                                                                                                 | Jerzy<br>Wojciech<br>Agnieszka                                                                                     | Co-Investigator<br>Co-Investigator<br>Local Investigator                                                                                                                                                                     |
|              | <b>POL05 - Lodz - Polish Mother's Memorial Hospital (I.C.Z.M.P)</b>                             | Cieslak<br>Cytryk<br>Dziasosz<br>Jastzebowska<br>Krysiak<br>Szymanska<br>Wilczyński<br>Zawodniak-Szalapska                          | Agnieszka<br>Katarzyna<br>Krzysztof<br>Joanna<br>Anna<br>Ursula<br>Jan<br>Malgorzata                               | Study Nurse<br>Local Investigator<br>Co-Investigator<br>Study Nurse<br>Study Nurse<br>Study Nurse<br>Co-Investigator<br>Co-Investigator                                                                                      |
| <b>Spain</b> | <b>SPA01 Hospital Universitario Cruces, BioCruces, UPV/EHU, CIBERDEM, CIBERER Bilbao, Spain</b> | Aguayo<br>Bilbao<br>Castano<br>Chueca<br>Cortazar<br>Echarte<br>Gonzalez Frutos<br>Jimenez<br>Martul<br>Moreno<br>Oyarzabal<br>Rica | Anibal<br>Jose Ramon<br>Luis<br>Maria<br>Alicia<br>Goretti<br>Teba<br>Paloma<br>Pedro<br>Ana<br>Mirentxu<br>Itxaso | Co-Investigator<br>Co-Investigator<br>National Investigator<br>Co-Investigator<br>Co-Investigator<br>Study Nurse<br>Local Coordinator<br>Study Nurse<br>Co-Investigator<br>Study Nurse<br>Co-Investigator<br>Co-Investigator |

...continued **eTable 1.** List of TRIGR Study Group Members

|                                                            |                                                                                                                               |                                                                                                     |                                                                                                                                                                             |
|------------------------------------------------------------|-------------------------------------------------------------------------------------------------------------------------------|-----------------------------------------------------------------------------------------------------|-----------------------------------------------------------------------------------------------------------------------------------------------------------------------------|
|                                                            | Salgado                                                                                                                       | Yolanda                                                                                             | Study Nurse                                                                                                                                                                 |
| <b>Hospital Clínico San Carlos-<br/>Coordinator Center</b> | Serrano-Ríos<br>Martínez-Larrad                                                                                               | Manuel<br>María Teresa                                                                              | National Investigator<br>Local Coordinator                                                                                                                                  |
| <b>SPA02 - Madrid - Hospital Clinico<br/>San Carlos</b>    | Hawkins<br>Herranz<br>Pallardo<br>Saez de Ibarra                                                                              | Federico Gustavo<br>Lucrecia<br>Luis Felipe<br>Lourdes                                              | Co-Investigator<br>Co-Investigator<br>Co-Investigator<br>Study Nurse                                                                                                        |
| <b>SPA03 - Madrid - Hospital Gregorio<br/>Marañón</b>      | Huidobro Fernandez<br>Leon Luis<br>Ortíz-Quintana<br>Pintado Recarte<br>Rodriguez Arnau                                       | Belén<br>Juan<br>Luis<br>Pilar<br>Dolores                                                           | Co-Investigator<br>Co-Investigator<br>Co-Investigator<br>Co-Investigator<br>Co-Investigator                                                                                 |
| <b>Sweden</b>                                              |                                                                                                                               |                                                                                                     |                                                                                                                                                                             |
| <b>SWE01 - Linköping - University of<br/>Linköping</b>     | Aronsson<br>Bodén<br>Fredriksson<br>Isacsson<br>Johansson<br>Karlsson<br>Lock<br>Ludvigsson<br>Sandström<br>Smolinska Konefal | Linda<br>Stina<br>Jenny<br>Eva<br>Ingela<br>Erika<br>Charlotta<br>Johnny<br>Ann-Marie<br>Malgorzata | Study Dietitian<br>Study Dietitian<br>Study Nurse<br>Study Nurse<br>National Coordinator<br>Study Dietitian<br>National Investigator<br>Study Nurse<br>National Coordinator |
| <b>SWE02 - Uddevalla - Uddevalla<br/>Hospital</b>          | Andreasson<br>Dahlström<br>Hanas<br>Lundqvist<br>Windell                                                                      | Catarina<br>Ulla<br>Ragnar<br>Kristin<br>Lena                                                       | Study Dietitian<br>Study Dietitian<br>Local Investigator<br>Study Nurse<br>Study Nurse                                                                                      |
| <b>SWE03 - Göteborg -<br/>GothenburgThe Queen Silvia</b>   | Jansson<br>Karlsson                                                                                                           | Inger<br>Ann-Katrine                                                                                | Study Nurse<br>Study Nurse                                                                                                                                                  |

© 2014 American Medical Association. All rights reserved.

...continued **eTable 1.** List of TRIGR Study Group Members

|                                                   |                  |                |                                |
|---------------------------------------------------|------------------|----------------|--------------------------------|
| <b>Children's Hospital</b>                        | Lindbladh        | Bengt          | Local Investigator             |
|                                                   | Odenman          | Ingrid         | Study Dietitian                |
|                                                   | Pettersson       | Carina         | Study Nurse                    |
|                                                   | Sundqvist        | Maud           | Study Nurse                    |
| <b>SWE05 - Halmstad - Halmstad Hospital</b>       | Aronsson         | Stefan         | Study Doctor                   |
|                                                   | Bellman          | Ingegerd       | Study Dietitian                |
|                                                   | Bengtsson        | Ann-Britt      | Study Nurse                    |
|                                                   | Lydén            | Gun-Britt      | Laboratory technician          |
|                                                   | Nilsson          | Nils-Östen     | Local Investigator             |
|                                                   | Söderblom<br>Unt | Maj<br>Cecilia | Study Dietitian<br>Study Nurse |
| <b>SWE06 - Trollhättan - Trollhättan Hospital</b> | Bengtsson        | Malin          | Study Dietitian                |
|                                                   | Fors             | Hans           | Local Investigator             |
|                                                   | Helmrich         | Anneli         | Study Dietitian                |
|                                                   | Osland Johansson | Turid          | Study Dietitian                |
| <b>SWE07 - Norrköping - Vrinnevi Hospital</b>     | Andersson        | Ann-Catrin     | Study Nurse                    |
|                                                   | Hellgren         | Gudrun         | Study Nurse                    |
|                                                   | Källsholm        | Helena         | Dietician                      |
|                                                   | Lindqvist        | Josefina       | Study Nurse                    |
|                                                   | Nilsson          | Mona           | Study Dietitian                |
|                                                   | Nordwall         | Maria          | Local Investigator             |
|                                                   | Åhsberg          | carolina       | Study nurse                    |
| <b>SWE08 - Borås - Borås Hospital</b>             | Lindh            | Agne           | Local Investigator             |
|                                                   | Lindhe           | Catarina       | Study Dietitian                |
|                                                   | Samuelsson       | Carina         | Study Dietitian                |
|                                                   | Wiik             | Annica         | Study Nurse                    |
| <b>SWE09 - Karskrona - Karlskrona Hospital</b>    | Edenwall         | Hans           | Local Investigator             |
|                                                   | Persson          | Ing-Britt      | Study Dietitian                |
|                                                   | Strigard         | Eva            | Study Nurse                    |
|                                                   | Svensson         | Britt-Louise   | Study Nurse                    |

...continued **eTable 1.** List of TRIGR Study Group Members

|                    |                                                               |                                                                                                                  |                                                                                                                       |                                                                                                                                                                                                                                                                     |
|--------------------|---------------------------------------------------------------|------------------------------------------------------------------------------------------------------------------|-----------------------------------------------------------------------------------------------------------------------|---------------------------------------------------------------------------------------------------------------------------------------------------------------------------------------------------------------------------------------------------------------------|
|                    | <b>SWE10 - Örebro - University Hospital</b>                   | Åman<br>Breivik<br>Detlofsson<br>Kroon                                                                           | Jan<br>Gun-Eli<br>Inga-Lill<br>Marianne                                                                               | Local Investigator<br>Study Nurse<br>Study Dietitian<br>Study Nurse                                                                                                                                                                                                 |
|                    | <b>SWE11 - Jönköping - Ryhovs Hospital</b>                    | Johansson<br>Ilvered<br>Lundberg<br>Åkesson                                                                      | Calle<br>Rosita<br>Anna<br>Karin                                                                                      | Local Investigator<br>Study Nurse<br>Study Nurse<br>Local Investigator                                                                                                                                                                                              |
| <b>Switzerland</b> | <b>SWT01 - Zürich - University Children's Hospital</b>        | Beccarelli<br>Gadient<br>Rappold-Amrein<br>Schoenle                                                              | Angela<br>Margrit<br>Christina<br>Eugen                                                                               | Study Dietitian<br>Local Coordinator<br>Study Dietitian<br>National Investigator                                                                                                                                                                                    |
| <b>USA</b>         | <b>USA01 - Pittsburgh - Children's Hospital of Pittsburgh</b> | Becker<br><br>Daftary<br>Damagro-Elias<br>Franciscus<br><br>Gilmour<br>Klein<br>Lain<br>Salerno<br>Smith<br>Vats | Dorothy<br><br>Ashi<br>Mary Ellen<br>Margaret<br><br>Carol<br>Mary Beth<br>Christine<br>Dawn<br>Mary Ellen<br>Kalyani | USA National Investigator /<br>Pittsburgh Local Investigator<br><br>Co-Investigator<br>Study Dietitian<br>USA Coordinator /<br>Pittsburgh Coordinator<br><br>Co-Investigator<br>Study Nurse<br>Co-Investigator<br>Study Nurse<br>Study Dietitian<br>Co-Investigator |
|                    | <b>USA02 - Seattle - Puget Sound Health System</b>            | Jones Pfaff<br>Malone<br>Mansfield<br>Munns<br>Nickel<br>Palmer<br>Pompilio                                      | Dawn<br>Patricia<br>Pam<br>Misty<br>Katherine<br>Jerry<br>Kristin                                                     | Research Assistant<br>Study Coordinator<br>Study Coordinator<br>Coordinator<br>Coordinator<br>Local-Investigator<br>Coordinator                                                                                                                                     |

...continued **eTable 1.** List of TRIGR Study Group Members

|                                                                 |                 |          |                       |
|-----------------------------------------------------------------|-----------------|----------|-----------------------|
|                                                                 | Siemion         | Wendy    | Study Nurse           |
|                                                                 | Taculad         | Rachel   | Coordinator           |
|                                                                 | Van Horn        | Kelly    | Study Dietitian       |
|                                                                 | Zdanadewic      | Megan    | Study Dietitian       |
| <b>USA03 - St. Louis - Washington University</b>                | Chambliss       | Cheryl   | Study Nurse           |
|                                                                 | Jones           | Jackie   | Recruiter             |
|                                                                 | Sadler          | Michelle | Study Nurse           |
|                                                                 | Tanner-Blasiar  | Marilyn  | Coordinator           |
|                                                                 | White           | Neil     | Local-Investigator    |
| <b>USA04 - Los Angeles - Mattel Children's Hospital of UCLA</b> | Bell            | Cindy    | Study Nurse           |
|                                                                 | Camper          | Natalie  | Study Nurse           |
|                                                                 | Devaskar        | Sherin   | Co-Investigator       |
|                                                                 | Devaskar        | Uday     | Local-Investigator    |
|                                                                 | Horowitz        | Heather  | Coordinator/dietitian |
|                                                                 | Rogers          | Lisa     | Coordinator/dietitian |
|                                                                 | Shannahan       | Randi    | Research Assistant    |
|                                                                 | Silk            | Karin    | Study Nurse           |
| <b>USA05 - Ponce - Ponce School of Medicine</b>                 | Bermudez        | Zildalee | Recruiter             |
|                                                                 | Colon           | Roxana   | Coordinator           |
|                                                                 | Frazer          | Teresa   | Co-Investigator       |
|                                                                 | Martinez-Nieves | Brenda   | Study Dietitian       |
|                                                                 | Torres          | Jose     | Local Investigator    |
|                                                                 | Vega            | Jose     | Dietitian             |
| <b>USA06 - New York - Naomie Berrie Diabetes Center</b>         | Chan            | Mary     | Research Assistant    |
|                                                                 | Cook            | Steve    | Research Assistant    |
|                                                                 | Goland          | Robin    | Local Investigator    |
|                                                                 | Greenberg       | Ellen    | Coordinator           |
|                                                                 | Jules           | Nadimire | Research Technician   |
|                                                                 | Montes          | Jennifer | Research Assistant    |
|                                                                 | Nelson          | Maudene  | Dietitian             |
|                                                                 | Schachner       | Holly    | Co-Investigator       |
|                                                                 | Softness        | Barney   | Co-Investigator       |

...continued **eTable 1.** List of TRIGR Study Group Members

| <b>Laboratories</b>                                        |                |                 |                                                                                         |  |
|------------------------------------------------------------|----------------|-----------------|-----------------------------------------------------------------------------------------|--|
| <b>HLA-typing Laboratory - Turku - Finland</b>             | Ilonen         | Jorma           | Head of HLA-typing Laboratory                                                           |  |
|                                                            | Kiviniemi      | Minna           | Laboratory Manager                                                                      |  |
| <b>HLA-typing Laboratory - Pittsburgh - PA - USA</b>       | Suominen       | Ritva           | Technician                                                                              |  |
|                                                            | Alexander      | Angela          | Technician                                                                              |  |
|                                                            | Hyrckowian     | Elizabeth       | Chief Technician                                                                        |  |
|                                                            | Nichol         | Lynn            |                                                                                         |  |
| <b>Cow's Milk Antibody Laboratory - Helsinki - Finland</b> | Stefura        | Christopher     | Head of HLA-typing Laboratory                                                           |  |
|                                                            | Trucco         | Massimo         |                                                                                         |  |
|                                                            | Karjalainen    | Erja            | Secretary                                                                               |  |
|                                                            | Louhio         | Terttu          | Technician                                                                              |  |
|                                                            | Sarnesto       | Annikki         | Co-Investigator                                                                         |  |
| <b>Autoantibody Laboratory - Helsinki - Finland</b>        | Savilahti      | Erkki           | Head of Cow's Milk Antibody Laboratory                                                  |  |
|                                                            | Valtonen       | Elsa            | Co-Investigator                                                                         |  |
|                                                            | Davydova       | Berta           | Technician                                                                              |  |
|                                                            | Helander       | Sinikka         | Technician                                                                              |  |
|                                                            | Hämäläinen     | Juho            | Technician                                                                              |  |
|                                                            | Härkönen       | Taina           | Co-Investigator                                                                         |  |
|                                                            | Joutsjoki      | Leni            | Technician                                                                              |  |
|                                                            | Kararic        | Mevlida         | Technician                                                                              |  |
|                                                            | Knip           | Mikael          | Deputy PI until 30.6.08,<br>PI of the Study from 1.7.08,<br>Head of Antibody Laboratory |  |
|                                                            | Latva-Koivisto | Markku          | Technician                                                                              |  |
|                                                            | Lönn           | Eija            | Technician                                                                              |  |
|                                                            | Nurmi          | Tiina           | Technician                                                                              |  |
|                                                            | Ollila         | Iris            | Technician                                                                              |  |
| Rinkinen                                                   | Jukka          | Technician      |                                                                                         |  |
| Ronkainen                                                  | Matti          | Co-Investigator |                                                                                         |  |
| Tukiainen                                                  | Helena         | Technician      |                                                                                         |  |

...continued **eTable 1.** List of TRIGR Study Group Members

|                                                  |            |              |                           |
|--------------------------------------------------|------------|--------------|---------------------------|
| <b>T-Cell Laboratory - Helsinki - Finland</b>    | Cederlöf   | Annika       | Technician                |
|                                                  | Kiikeri    | Maria        | Technician                |
|                                                  | Luopajarvi | Kristiina    | Local investigator        |
|                                                  | Tsupari    | Sinikka      | Technician                |
|                                                  | Vaarala    | Outi         | Head of T-cell Laboratory |
| <b>T-Cell Laboratory - Toronto - ON - Canada</b> | Cheung     | Roy          |                           |
|                                                  | Bryant     | Kirsten      | Technician                |
|                                                  | Chan       | Yin          | Graduate Student          |
|                                                  | Dosch      | Hans-Michael | Head of T-Cell Laboratory |
|                                                  | Maezawa    | Yuko         | Fellow                    |
|                                                  | Paltser    | Geoffrey     | Graduate Student          |
|                                                  | Rasavi     | Rozy         | Graduate Student          |
|                                                  | Tsui       | Hubert       | Fellow                    |
|                                                  | Winer      | Shawn        | Fellow                    |
|                                                  | Wu         | Ping         | Technician                |
|                                                  | Yantha     | Jason        | Graduate Student          |

**eTable 2.** The Autoantibody Reactivity Appearing First in the Casein Hydrolysate Group and in the Control Group

| Autoantibody reactivity             | Casein hydrolysate group<br>(N=139) | Control Group<br>(n=117) | P value |
|-------------------------------------|-------------------------------------|--------------------------|---------|
| Islet cell antibodies (ICA), n (%)  | 23 (16.6%)                          | 18 (15.4%)               | .80     |
| Insulin autoantibodies (IAA), n (%) | 27 (19.4%)                          | 20 (17.1%)               | .63     |
| Antibodies to GAD (GADA),n (%)      | 27 (19.4%)                          | 19 (16.2%)               | .51     |
| Antibodies to IA-2 (IA-2A), n (%)   | 0 (0.0%)                            | 2 (1.7%)                 | .12     |
| Two autoantibodies                  | 35 (25.1%)                          | 29 (24.8%)               | .94     |
| - ICA + IAA, n (%)                  | 12 (8.6%)                           | 7 (6.0%)                 | .42     |
| - ICA+GADA, n (%)                   | 12 (8.6%)                           | 9 (7.7%)                 | .78     |
| - ICA +IA-2A, n (%)                 | 1 (0.4%)                            | 2 (1.7%)                 | .46     |
| - IAA + GADA, n (%)                 | 8 (5.8%)                            | 7 (6.0%)                 | .94     |
| - IAA + IA-2A, n (%)                | 1 (0.7%)                            | 1 (0.9%)                 | .90     |
| - GADA + IA-2A, n (%)               | 1 (0.7%)                            | 3 (2.6%)                 | .24     |
| Three autoantibodies                | 20 (14.4%)                          | 17 (14.5%)               | .97     |
| - ICA + IAA + GADA, n (%)           | 16 (11.5%)                          | 14 (12.0%)               | .91     |
| - ICA + IAA + IA-2A, n (%)          | 1 (0.7%)                            | 2 (1.7%)                 | .46     |
| - ICA + GADA + IA-2A, n (%)         | 2 (1.4%)                            | 0 (0.0%)                 | .19     |
| - IAA + GADA + IA-2A, n (%)         | 1 (0.7%)                            | 1 (0.9%)                 | .90     |
| All four autoantibodies, n (%)      | 7 (5.0%)                            | 12 (10.3%)               | .11     |



**eTable 3.** Initial and Maximal Autoantibody Titers in the Casein Hydrolysate Group and in the Control Group

Autoantibody titers (median and interquartile range, [ ] = the number of positive children) in the first autoantibody-positive sample and in the sample with the maximal titer in the casein hydrolysate group and in the control group among those with multiple autoantibodies.

| Autoantibody reactivity       | Casein hydrolysate group<br>(N=139) | Control group<br>(n=117)  | P value |
|-------------------------------|-------------------------------------|---------------------------|---------|
| <b>Islet cell antibodies</b>  |                                     |                           |         |
| - first positive titer, JDFU* | 16 (4 – 17.1) [139]                 | 13 (4 – 93) [117]         | 0.531   |
| - maximal titer, JDFU         | 128 (32 – 380) [139]                | 160 (23 – 512) [117]      | 0.229   |
| <b>Insulin autoantibodies</b> |                                     |                           |         |
| - first positive titer, RU**  | 7.1 (4.0 – 17.1) [111]              | 6.8 (4.4 – 12.9) [94]     | 0.829   |
| - maximal titer, RU           | 15.5 (6.4 – 33.1) [139]             | 13.3 (4.6 – 35.4) [117]   | 0.381   |
| <b>Antibodies to GAD</b>      |                                     |                           |         |
| - first positive titer, RU    | 30.0 (13.6 – 85.8) [122]            | 22.0 (12.0 – 65.3) [98]   | 0.176   |
| - maximal titer, RU           | 71.5 (18.2 – 420.1) [139]           | 40.9 (13.9 – 308.1) [117] | 0.060   |
| <b>Antibodies to IA-2</b>     |                                     |                           |         |
| - first positive titer, RU    | 37.8 (4.1 – 119.6) [90]             | 12.7 (2.7 – 80.9) [82]    | 0.068   |
| - maximal titer, RU           | 26.6 (0.3 – 285.4) [139]            | 32.1 (0.5 – 302.3) [117]  | 0.900   |

\*JDFU; Juvenile Diabetes Foundation units, \*\*RU; relative units

**eTable 4.** Reported Adverse Events in the 2 Arms of the TRIGR Study

| Event                                                                                 | Casein Hydrolysate     |                  |                            | Control Formula        |                  |                            | P-Value       |
|---------------------------------------------------------------------------------------|------------------------|------------------|----------------------------|------------------------|------------------|----------------------------|---------------|
|                                                                                       | Number of Participants | Number of Events | Events/ Month of Follow-Up | Number of Participants | Number of Events | Events/ Month of Follow-Up |               |
| Upper Respiratory Infection                                                           | 747                    | 4942             | 0.0508                     | 765                    | 5121             | 0.0517                     | 0.3835        |
| Gastroenteritis                                                                       | 471                    | 1323             | 0.0136                     | 482                    | 1258             | 0.0127                     | 0.0816        |
| Urinary Tract Infection                                                               | 79                     | 125              | 0.0013                     | 91                     | 115              | 0.0012                     | 0.4318        |
| Middle Ear Infection                                                                  | 510                    | 1674             | 0.0172                     | 523                    | 1829             | 0.0185                     | <b>0.0375</b> |
| Pneumonia                                                                             | 86                     | 99               | 0.0010                     | 85                     | 112              | 0.0011                     | 0.4458        |
| Other Infection                                                                       | 723                    | 2779             | 0.0286                     | 737                    | 2820             | 0.0285                     | 0.8941        |
| Suspected Study Formula Intolerance                                                   | 52                     | 64               | 0.0007                     | 60                     | 78               | 0.0008                     | 0.2869        |
| Asthma, Other Forms of Allergy                                                        | 293                    | 548              | 0.0056                     | 309                    | 620              | 0.0063                     | 0.0727        |
| Malignancy                                                                            | 2                      | 2                | 0.0000                     | 1                      | 1                | 0.0000                     | 0.5614        |
| Accident (Not Requiring Hospitalization)                                              | 111                    | 145              | 0.0015                     | 116                    | 144              | 0.0015                     | 0.8309        |
| Accident (Requiring Hospitalization)                                                  | 16                     | 17               | 0.0002                     | 22                     | 24               | 0.0002                     | 0.3028        |
| Death                                                                                 | 5                      | 5                | 0.0001                     | 4                      | 4                | 0.0000                     | 0.4688        |
| Other                                                                                 | 855                    | 3955             | 0.0406                     | 833                    | 3949             | 0.0398                     | 0.3807        |
| Hypoglycemia requiring IV glucose                                                     | 10                     | 10               | 0.0001                     | 20                     | 20               | 0.0003                     | 0.0814        |
| Event requiring inpatient hospitalization or prolongation of existing hospitalization | 38                     | 51               | 0.0007                     | 37                     | 43               | 0.0006                     | 0.3617        |
| Life-threatening event                                                                | 2                      | 2                | 0.0000                     | 3                      | 3                | 0.0000                     | 0.6714        |
| Persistent or significant disability/incapacity                                       | 1                      | 2                | 0.0000                     | 3                      | 3                | 0.0000                     | 0.6714        |
| Any Infection                                                                         | 938                    | 9520             | 0.0978                     | 933                    | 9885             | 0.0997                     | 0.1762        |
| Serious Event (Onset <= April 26, 2006)*                                              | 320                    | 568              | 0.0124                     | 324                    | 533              | 0.0119                     | 0.1655        |
| Serious Event (Onset >= April 27, 2006)*                                              | 55                     | 74               | 0.0010                     | 57                     | 68               | 0.0009                     | 0.5407        |
| Study Related Serious Event (Onset <= April 26, 2006)*                                | 3                      | 3                | 0.0001                     | 2                      | 2                | 0.0000                     | 0.6426        |
| Study Related Serious Event (Onset >= April 27, 2006)*                                | 0                      | 0                | 0.0000                     | 0                      | 0                | 0.0000                     | .             |

\*Serious Event - Defined based on Date of Onset:

*Onset <= April 26, 2006: Event of Malignancy, Accident (Requiring Hospitalization), or Death OR an Event Requiring either an Emergency Room Visit or Inpatient Hospital Visit*

*Onset >= April 27, 2006: Event of Malignancy, Accident (Requiring Hospitalization), Death, Requiring Inpatient Hospitalization or Prolongation of Existing Hospitalization, Life-Threatening, or Persistent or Significant Disability/Incapacity*

**eFigure 1.** Cumulative Survival Without Islet Cell Antibodies, Insulin Autoantibodies and Autoantibodies to Glutamic Acid Decarboxylase and the Insulinoma-Associated 2 Molecule (IA-2) in the 2 Study Groups According to the Per-Protocol Analysis

The cumulative survival without at least two autoantibodies (Panel A) and at least one autoantibody (Panel B) in the casein hydrolysate group and in the control group according to the age of the children at the time the autoantibodies were detected is shown.

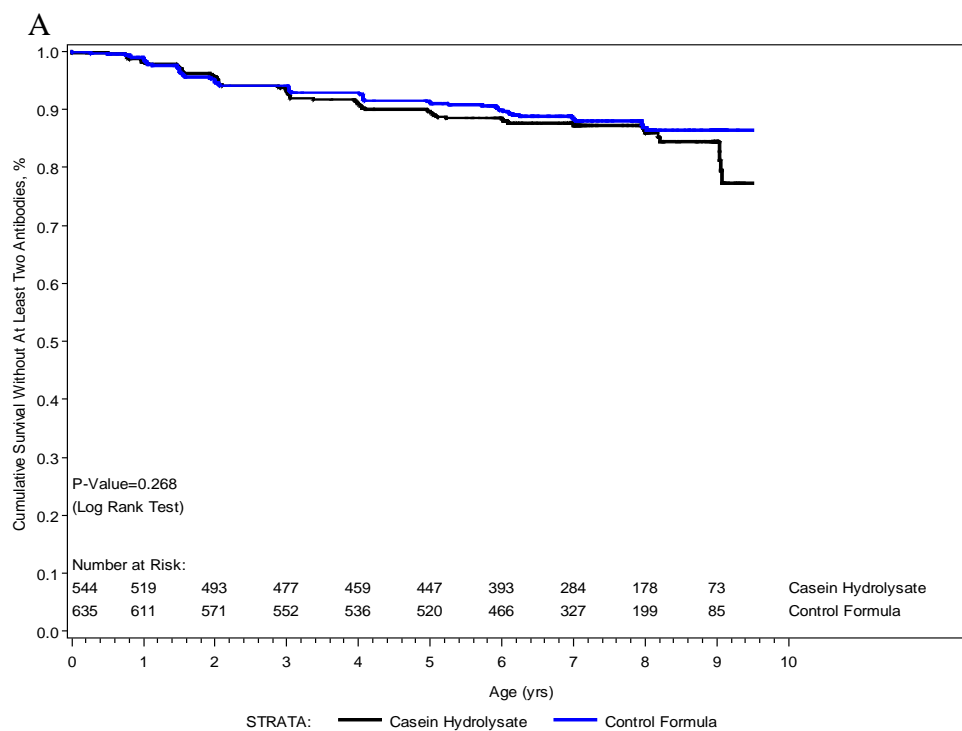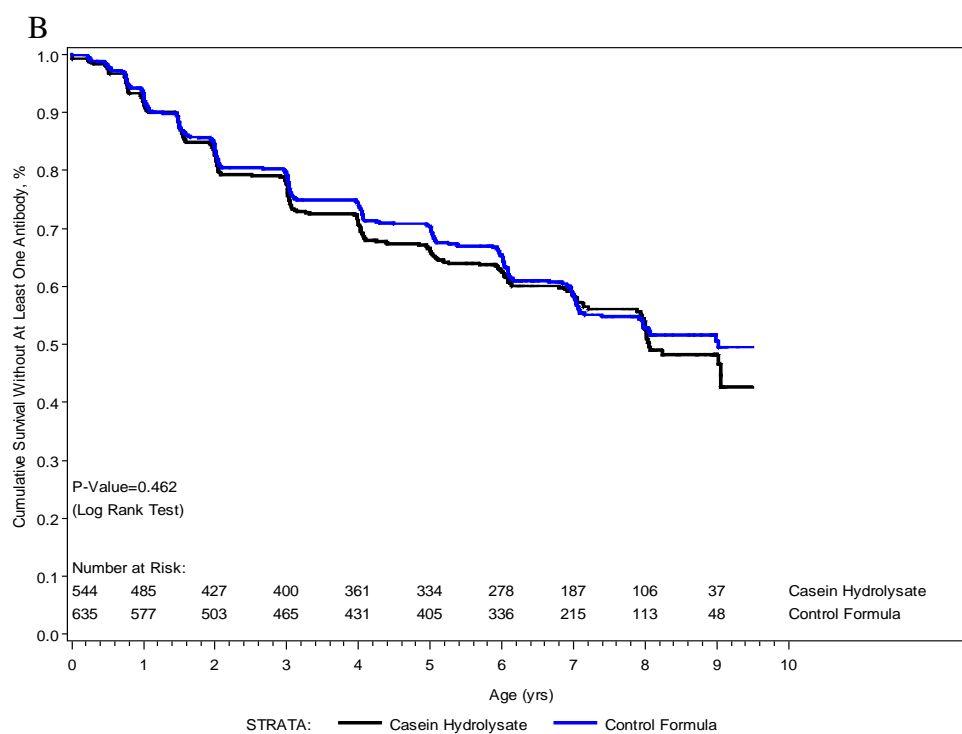

**eFigure 2.** Cumulative Survival Without Islet Cell Antibodies, Insulin Autoantibodies and Autoantibodies to Glutamic Acid Decarboxylase and the Insulinoma-Associated 2 Molecule (IA-2) in the 2 Study Groups According to the Per-Protocol Analysis

The cumulative survival without islet-cell antibodies (Panel A), insulin autoantibodies (Panel B), GAD antibodies (Panel C) and IA-2 autoantibodies (Panel D) in the casein hydrolysate group and in the control group according to the age of the children at the time the autoantibodies were detected is shown.

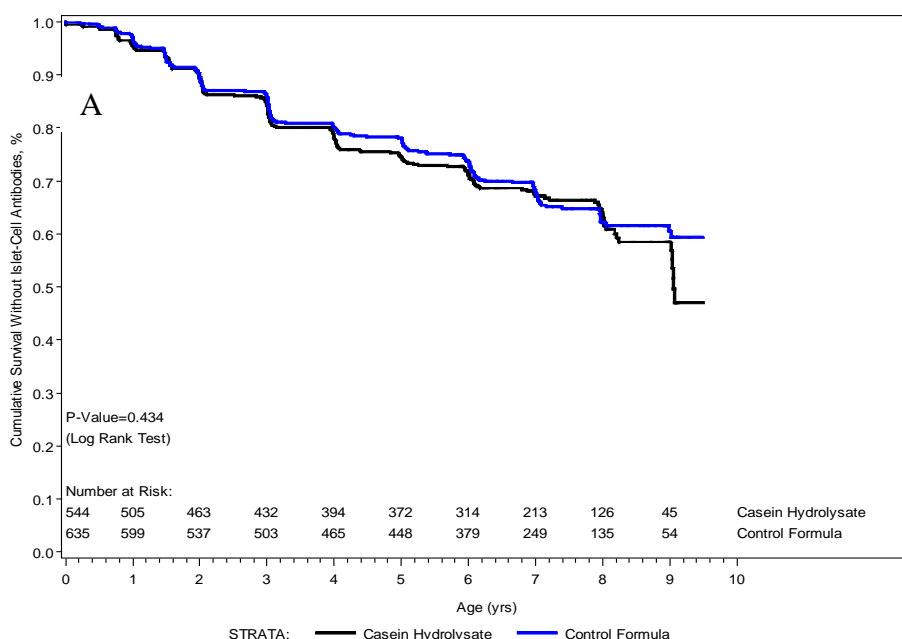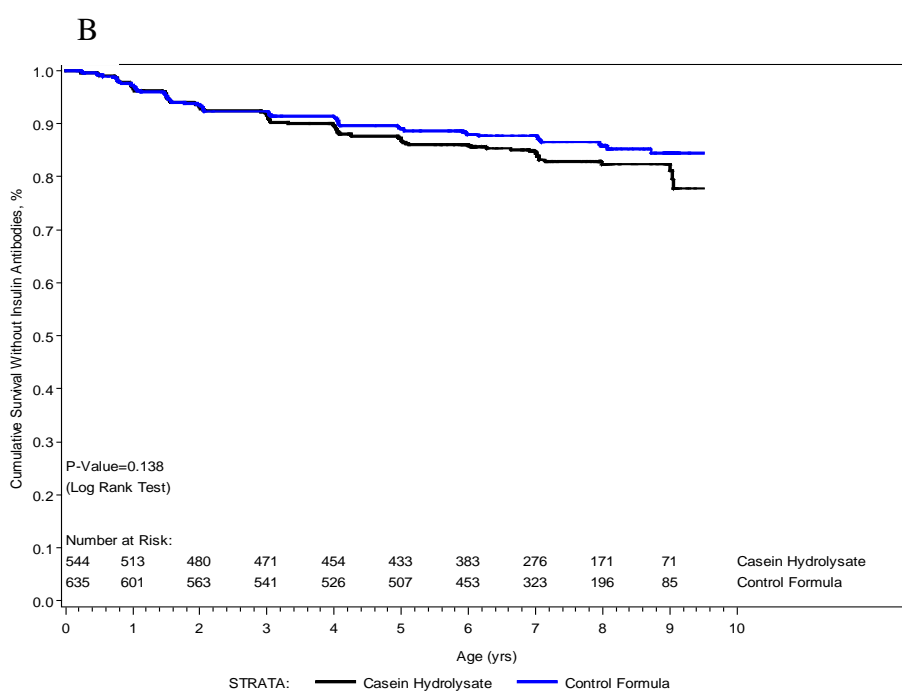

...continued eFigure 2.

C

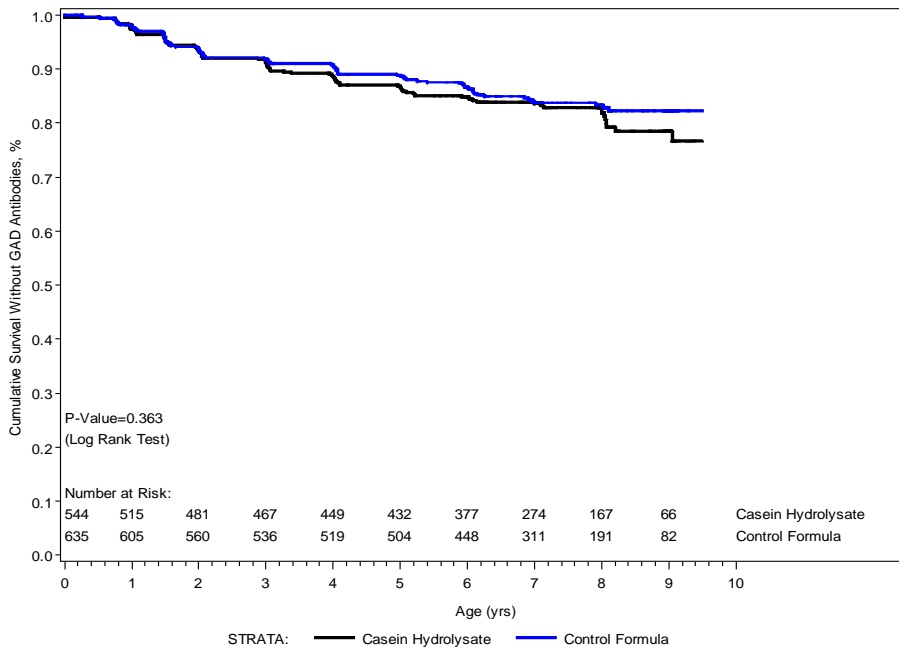

D

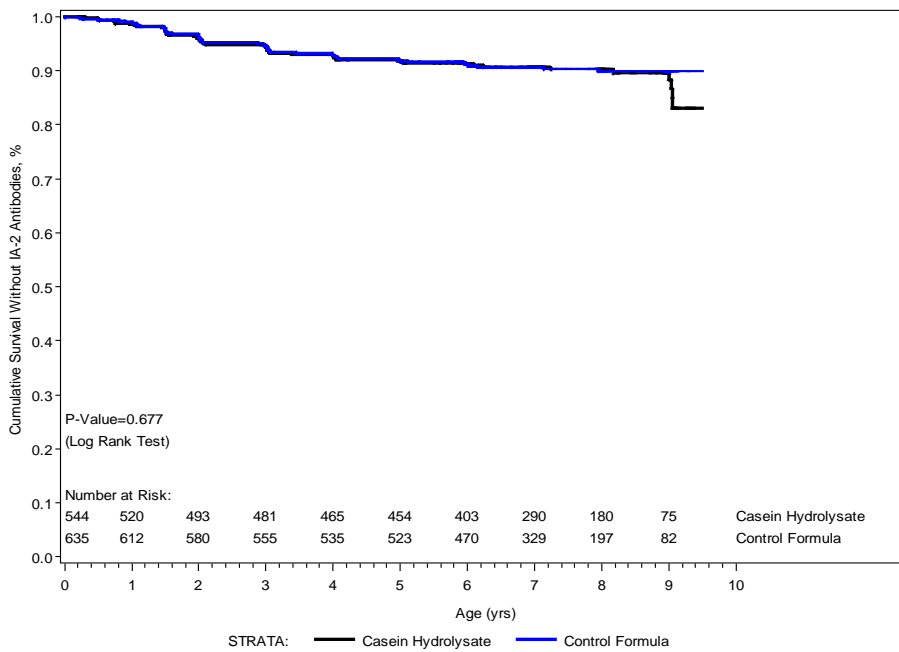

**eFigure 3. Hazard Ratios (95% CI) for Subgroups in the Whole Trial (A) and for Subgroups Among the Finnish Participants According to the Per-Protocol Analysis (B)**  
 NC = not computable

**eFigure 3A**

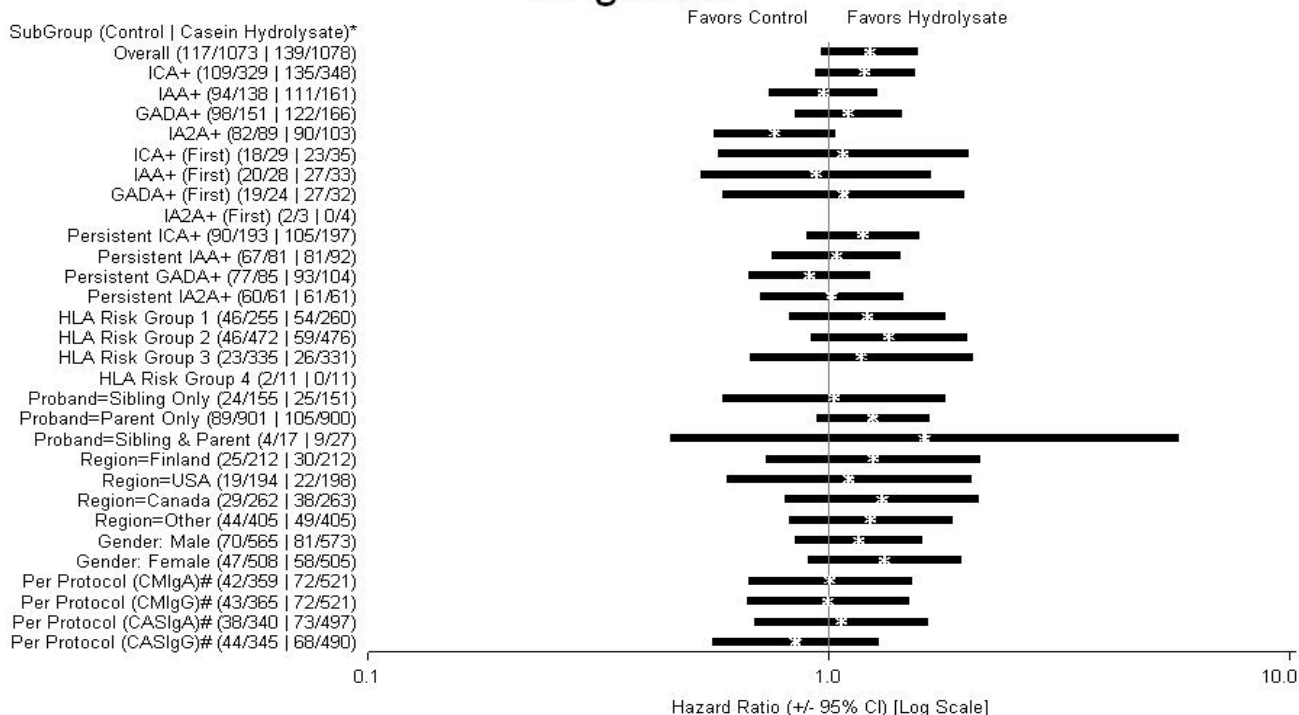

\* (N with Outcome/N in Subgroup) for each Treatment

**eFigure 3B**

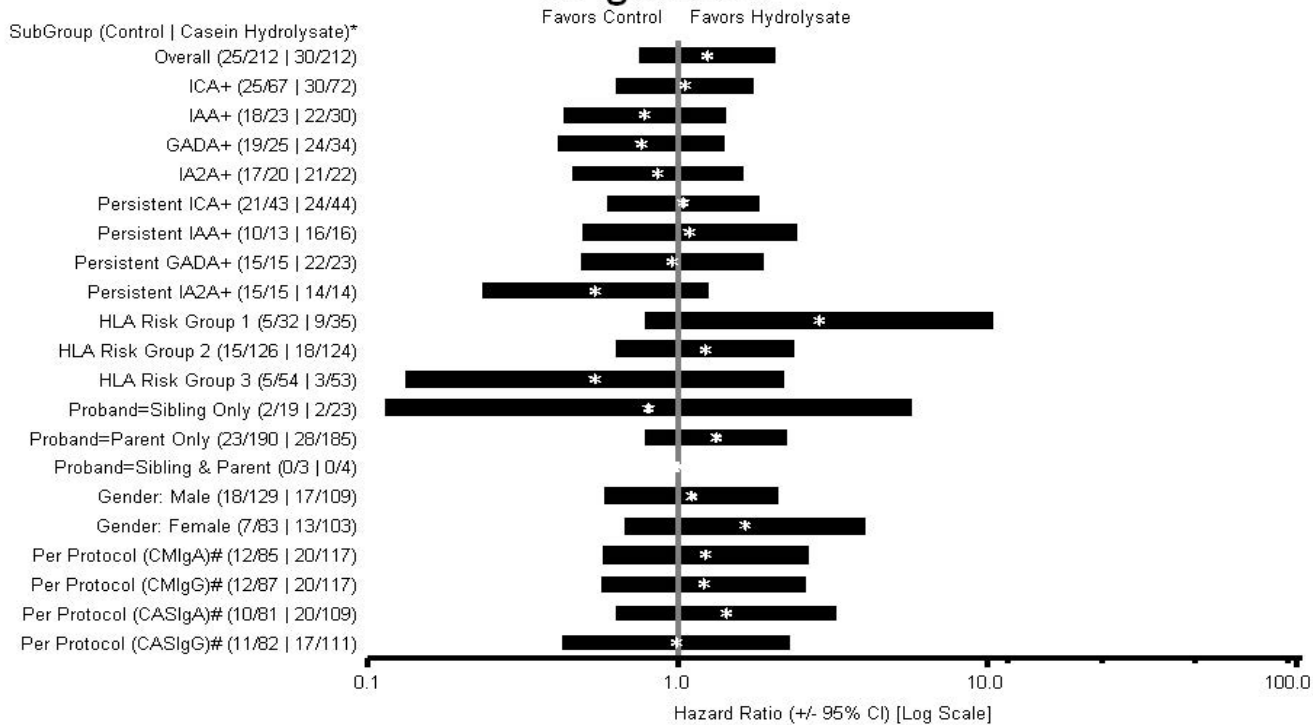

\* (N with Outcome/N in Subgroup) for each Treatment

\* The numbers in parentheses refer to the number of children who had an event out of the total population in that subgroup.
